# Supplementary material for: Serum PCSK9 is a novel serological biomarker for the diagnosis and prognosis of pancreatic cancer
Source: PeerJ journal article supplement (doi:10.7717/peerj.18018), 2024-09-10

**A**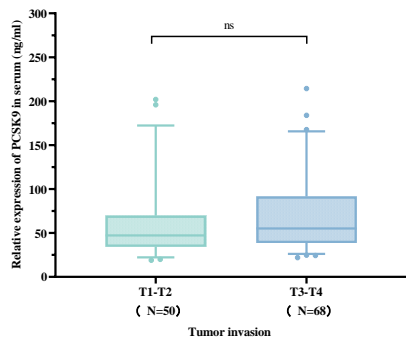**B**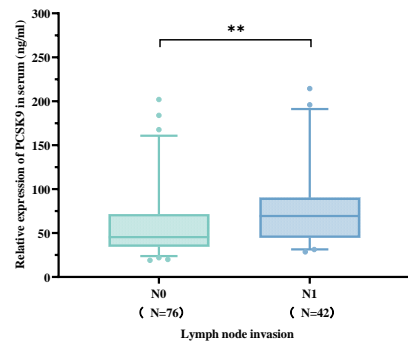**C**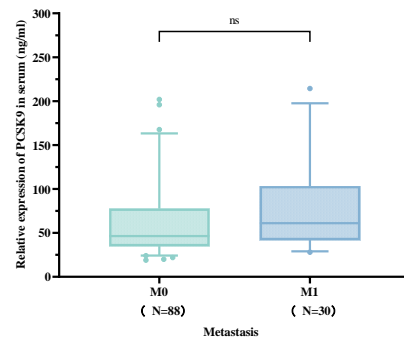**D**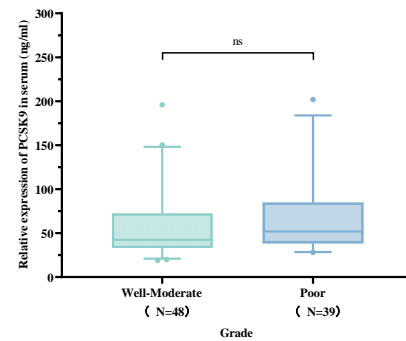**E**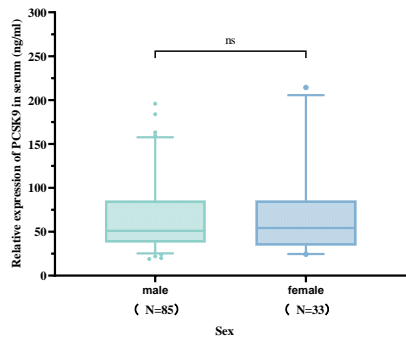**F**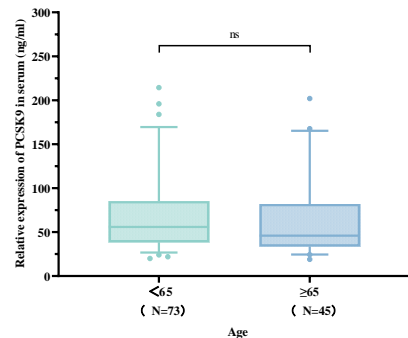**G**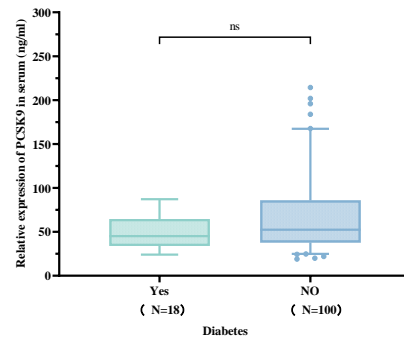**H**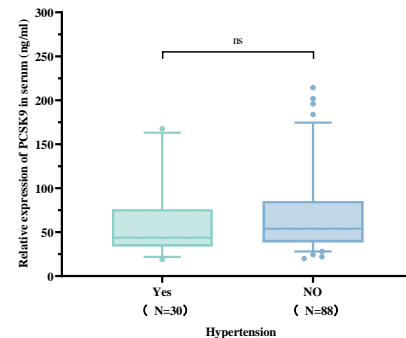

Supplement: Figure_S1_staffRL.pdf [file Figure_S1_staffRL.pdf]
