# Supplementary material for: Serum PCSK9 is a novel serological biomarker for the diagnosis and prognosis of pancreatic cancer
Source: PeerJ. 2024 Sep 10;12:e18018. doi: 10.7717/peerj.18018 (PMC11397121; doi:10.7717/peerj.18018)
Supplement: Supplemental Information 1 [file peerj-12-18018-s001.xls]

## Sheet: PC
Gender	Age	PCSK9	CA19-9	Smoking	Drinking	Diabetes mellitus	Hypertension	BMI	Triglycerides	Cholesterol	HDL	LDL	Tumor stage	Tumor size(cm)	Lymph node metastasis	Distant metastasis	Tumor Differentiation	Progression	Time(month)
male	61	53.2937	48.4	yes	no	no	no	25.2493	3.02	4.67	1.37	2.56	IB	2.5	no	no	moderate	-	-
male	57	163.252	522	no	no	no	no	21.6128	1.84	2.9	0.47	1.13	III	2.4	yes	no	-	no	12
male	66	45.9223	>1000	yes	yes	no	no	22.6474	1.18	4.44	1.15	2.89	IV	3.8	yes	yes	moderate	no	12
female	55	214.322	>1000	no	no	no	no	20.3125	2.79	5.23	0.34	2.01	IV	4	yes	yes	-	no	16
male	62	59.84	726	yes	yes	no	yes	19.721	1.4	5.24	1.17	3.5	IV	6.3	yes	yes	well	-	-
male	40	85.8783	56.4	yes	no	no	no	23.03	1.25	2.45	0.94	1.17	III	4.7	no	no	moderate	no	5
female	57	68.3813	868	no	no	no	no	23.4952	1.21	4.38	1.29	2.53	III	3.4	no	no	-	no	9
female	75	153.081	>1000	no	no	no	yes	26.2227	3.13	8.49	0.29	1.18	IV	3.8	yes	yes	-	-	-
male	63	69.0773	81.3	no	no	no	no	19.1406	1.32	3.09	0.8	1.65	IA	1	no	no	poor	-	-
female	57	149.756	57.5	no	no	no	yes	23.4375	1.55	5.54	1.22	3.67	III	4	no	no	-	yes	34
male	45	95.9625	2597	no	yes	no	no	25.0865	1.97	3.95	1	2.36	IV	3.6	yes	yes	-	no	9
male	43	183.902	816	yes	yes	no	no	21.7079	1.07	3.52	0.48	2.45	IV	4.6	no	yes	poor	-	-
male	49	99.2908	89.1	no	no	no	no	23.9512	1.33	4.42	0.97	2.73	III	4	no	no	moderate	-	-
male	53	61.8691	423	yes	yes	yes	no	18.3655	1.24	4.79	1.1	2.95	IV	6.7	yes	yes	-	no	10
male	54	39.8787	388	no	no	no	no	27.3356	2.02	2.87	0.64	1.22	IV	6.6	no	yes	poor	-	-
male	50	27.9539	8.45	no	no	no	no	23.6614	0.6	3.15	1.08	1.73	IV	7.2	no	yes	moderate	-	-
male	72	52.2179	572	yes	no	no	no	23.7387	1.06	2.79	0.96	1.3	IV	5	yes	yes	poor	-	-
female	59	42.1833	67.8	no	no	no	no	22.0001	1.62	5.37	1.27	3.43	III	2.4	no	no	moderate	-	-
male	69	33.6798	531	yes	yes	no	no	19.8347	2.33	3.02	0.23	0.68	IIB	3.2	yes	no	poor	-	-
male	58	31.2304	>1000	yes	no	no	no	22.0386	1.09	3.01	1.25	1.3	IV	5	yes	yes	-	-	-
male	61	63.6039	21.7	yes	yes	no	no	20.2812	1.05	2.92	0.7	1.67	IB	4	no	no	moderate	-	-
female	54	37.241	132	no	no	no	no	24.974	2.41	6.83	0.67	4.21	IB	2.8	no	no	moderate	no	7
female	77	33.0593	31.2	no	no	yes	yes	21.9138	0.76	3.07	1.01	1.7	IIB	3	yes	no	moderate	-	-
female	66	29.7708	255	no	no	no	no	22.4766	0.81	3.07	0.92	1.64	IV	6.8	no	yes	well	yes	42
male	50	31.1099	20.9	no	no	no	no	20.7008	1.07	2.63	0.79	1.28	IIA	4.5	no	no	poor	no	10
male	68	38.6181	>1000	yes	no	no	yes	20.6575	1.23	4.45	1.7	1.86	IB	3	no	no	poor	-	-
male	43	37.7657	31.9	no	no	no	no	22.2656	1.55	3.26	1.37	1.2	IB	3	no	no	moderate	no	27
male	74	28.0507	>1000	no	no	no	no	20.4491	1.09	4.33	1.64	2.15	IB	3.8	no	no	poor	no	23
male	46	34.4097	<2	yes	no	no	yes	20.4152	1.45	3.58	0.74	2.09	IB	4	no	no	poor	no	9
male	59	20.0281	<2	no	no	no	no	20.1733	1.21	3.95	1.08	2.11	IB	4	no	no	moderate	no	8
female	65	28.6445	2.12	no	no	no	no	23.8281	1.33	5.25	1.06	3.7	IIB	2.5	yes	no	moderate	-	-
female	65	54.3089	＞1000	no	no	no	no	23.9361	1.33	4.77	1.37	2.92	IV	5.2	no	yes	-	-	-
male	68	51.0417	688	yes	no	no	no	24.2215	1.36	5.17	1.16	3.29	IV	6.5	no	yes	poor	-	-
male	69	61.1445	352	yes	no	no	no	19.721	1.15	3.83	0.93	2.33	III	4	yes	no	poor	-	-
male	71	48.6164	＞10000	no	no	no	no	20.7612	2.32	4.9	1.2	3.05	III	5.3	no	no	-	-	-
male	74	35.702	＜2	yes	yes	no	no	23.5883	1.34	3.56	0.86	2.2	IV	4	no	yes	moderate	no	24
male	67	46.2986	＞1000	no	no	yes	yes	23.5294	0.96	2.6	1.09	1.18	IB	3.8	no	no	poor	no	38
male	71	159.493	312	yes	yes	no	yes	22.8928	1.44	4.7	1.07	2.79	IV	3.5	no	yes	poor	-	-
male	42	48.8804	668	yes	no	no	no	25.8166	3.47	6.59	0.55	3.05	IIB	4	yes	no	moderate	yes	41
male	70	86.7735	82.4	no	yes	yes	yes	22.0317	1.49	3.04	1.28	1.27	III	2.7	yes	no	-	yes	41
female	47	92.771	165	no	no	no	no	19.6506	1.42	4.06	1.24	2.2	III	4	no	no	poor	-	-
female	66	33.1543	15.5	no	no	yes	no	25.204	3.35	5.57	1	3.44	IA	1.5	no	no	moderate	-	-
female	45	47.8322	19.1	no	no	no	no	21.6441	1.77	9.85	0.22	2.6	IA	1.5	no	no	poor	no	34
male	57	21.9578	2.43	no	no	no	no	18.2531	0.96	4.8	1.43	3.23	IIA	3.4	no	no	moderate	-	-
female	68	34.3119	56.4	no	no	no	yes	12.8185	0.65	3.59	1.36	1.85	IB	5.5	no	no	moderate	-	-
female	67	34.8033	18.8	no	no	yes	no	24.8777	0.78	4.32	0.92	2.78	IIA	5.5	no	no	poor	-	-
male	51	59.1807	22.7	yes	yes	yes	yes	21.4619	1.13	4.22	1.15	2.59	IB	3.2	no	no	poor	-	-
male	70	18.9576	22.9	no	no	no	yes	22.3214	1	3.09	0.85	1.81	IB	3	no	no	moderate	yes	41
male	56	24.1278	52.3	yes	yes	yes	yes	23.3564	1.97	3.23	0.83	1.72	IB	3.5	no	no	moderate	-	-
female	74	30.0352	130	no	no	yes	no	23.7253	1.89	4.29	1.23	2.41	IB	2.1	no	no	moderate	-	-
male	64	53.4376	95.2	no	no	yes	no	21.7784	2.7	6	0.46	2.4	IB	2.3	no	no	poor	yes	40
male	63	71.1995	64.7	no	no	no	no	24.2188	1.14	4.95	1.35	2.83	IIB	3	yes	no	moderate	-	-
female	68	44.1492	＜2	no	no	no	yes	25.7812	1.38	3.13	0.97	1.68	IIB	4.3	yes	no	poor	-	-
female	63	73.0176	159	no	no	yes	no	16.8475	1.01	4.41	1.46	2.22	IV	4	no	yes	moderate	no	15
male	60	71.1995	＞1000	yes	yes	no	no	29.0698	1.63	4.55	0.97	2.93	III	5	yes	no	poor	no	2
female	56	72.6461	＞1000	no	no	no	no	23.1111	1.41	6.35	1.14	3.99	IV	-	no	yes	moderate	no	3
female	54	55.8967	>1000	no	no	no	no	18.6667	2.33	9.2	0.93	5.03	III	5	no	no	poor	-	-
male	56	87.0546	>1000	yes	no	yes	no	17.0068	1.83	3.76	0.5	2.41	IIB	3.5	yes	no	-	no	2
male	62	28.9216	74.4	yes	yes	no	no	21.4533	1.93	2.55	1	1.18	III	3.5	no	no	poor	no	9
male	58	88.1068	>1000	yes	yes	no	no	19.1406	0.93	3.78	1.15	2.13	III	4.9	yes	no	poor	-	-
female	58	163.252	<2	no	no	no	no	22.6003	2.15	3.75	1	2	III	3.7	yes	no	-	no	14
male	67	131.553	22.2	yes	yes	no	no	19.052	0.93	5.02	1.58	3.03	IV	4.1	yes	yes	poor	no	11
male	56	28.4739	<2	yes	no	no	yes	24.1633	1.31	5.03	0.82	3.51	IB	2.7	no	no	poor	-	-
male	36	84.621	488	no	no	no	no	29.0174	1.72	4.19	0.47	2.81	IIB	4	yes	no	poor	-	-
male	58	42.465	>1000	no	no	no	no	17.4472	0.99	3.28	1.08	1.94	IV	5.5	no	yes	moderate	-	-
male	69	33.2193	178	no	yes	no	yes	21.4533	1.02	3.01	0.89	1.72	III	2.3	no	no	moderate	-	-
female	81	24.7797	9.29	no	no	no	yes	15.6	0.74	4.89	2.01	2.62	III	4.5	no	no	moderate	-	-
male	68	33.6393	151	yes	yes	no	yes	18.3655	1.35	2.97	1.01	1.4	III	2.6	yes	no	-	-	-
male	67	72.2848	78.5	yes	yes	no	yes	20.0474	1.41	3.36	0.94	1.52	IV	2.5	no	yes	poor	-	-
female	50	145.642	>1000	no	no	no	no	-	1.36	4.75	0.66	3.46	IV	4.2	no	yes	moderate	no	4
male	66	153.081	160	yes	yes	no	no	20.9566	1.1	4.01	1.44	1.95	III	5.2	yes	no	-	no	14
male	75	105.264	17.3	yes	no	no	no	20.4152	0.96	3.95	1.37	2.09	III	4.5	no	no	-	-	-
male	53	98.5101	96.7	yes	no	no	yes	20.0474	1.11	3.44	0.62	2.34	IB	2.7	no	no	moderate	-	-
male	76	76.9926	>1000	no	no	no	no	19.4674	0.82	6.46	1.44	4.52	III	4	no	no	moderate	-	-
female	65	167.626	>1000	no	no	no	yes	31.6456	1.64	4.52	1.07	2.96	III	-	no	no	-	no	9
male	48	85.659	>1000	yes	yes	no	no	20.9573	0.83	2.65	0.77	1.46	IIA	4.3	no	no	-	-	-
male	62	98.2515	>1000	no	no	no	no	19.1467	1.33	4.87	1.14	2.94	IB	3.8	no	no	poor	no	6
male	62	87.2074	366	yes	yes	yes	no	20.2812	0.97	4.61	1.15	2.74	IV	3.5	yes	yes	moderate	-	-
male	50	51.8157	424	no	no	no	no	22.4813	0.82	4.37	1.66	2.51	IA	2	no	no	poor	-	-
male	72	94.7194	<2	yes	yes	no	no	25.565	0.89	4.09	1.03	2.63	IIA	7	no	no	poor	-	-
female	64	77.7752	180	no	no	no	no	22.8928	0.85	3.76	1.3	2.02	IIB	2.3	yes	no	moderate	yes	34
male	69	150.224	4.4	no	no	no	yes	24.5243	1.28	4.7	1.08	3.11	III	5.5	no	no	moderate	yes	34
male	68	42.3078	82.8	no	no	no	no	25.6055	1.92	4.72	1.24	2.84	III	2	no	no	moderate	no	20
male	38	127.917	<2	yes	no	no	no	17.301	1.78	4.45	0.48	2.95	IIB	2.5	yes	no	poor	no	24
male	52	62.7773	58	yes	yes	no	no	17.5556	1.86	4.26	0.4	2.74	IB	2.5	no	no	moderate	-	-
male	69	44.8418	252	no	no	no	no	22.4323	2.67	6.33	1.21	4.02	III	4.8	no	no	poor	no	37
male	50	35.7957	210	no	no	no	yes	27.6254	2.55	5.43	0.88	3.59	IV	2.5	no	yes	moderate	yes	36
male	55	46.4958	158	no	no	no	yes	20.6193	0.91	3.58	0.99	1.97	IB	2.5	no	no	moderate	no	32
male	64	38.6501	<2	no	no	no	no	20.202	1.66	4.64	0.84	3.33	IB	3.5	no	no	moderate	-	-
female	72	24.293	>1000	no	no	no	no	21.2279	1.07	5.12	1.15	3.5	III	2.5	no	no	moderate	yes	36
male	62	38.2244	119	yes	yes	no	no	21.9363	1.56	5.17	1.61	3.11	III	2.7	yes	no	moderate	-	-
female	65	201.981	195	no	no	no	no	19.7711	2.21	6.13	1.16	3.75	IB	3	no	no	poor	no	5
male	56	61.1975	43.4	yes	yes	no	no	20.8117	1.07	2.86	0.89	1.21	IB	4	no	no	moderate	-	-
female	77	59.3731	330	no	no	no	no	20.5049	1.82	5.76	0.83	3.36	III	4	no	no	-	no	6
male	80	34.1324	>1000	yes	no	yes	yes	21.5139	1.37	4.59	1.73	2.42	IB	2.5	no	no	poor	no	7
male	63	68.4654	330	no	no	no	no	23.3844	1.01	3.95	0.78	2.77	IIB	2.5	yes	no	poor	-	-
male	46	39.0319	>1000	no	no	yes	no	23.7954	1.5	3.19	1.19	1.4	IB	3	no	no	poor	-	-
female	62	70.2589	>1000	no	no	no	yes	25.6821	1.12	4.86	0.79	1	IV	4.1	yes	yes	-	-	-
female	64	43.6638	>1000	no	no	no	yes	18.4444	1.38	5.66	1.73	3.11	III	3.2	yes	no	poor	-	-
male	50	30.4305	23.1	yes	yes	no	no	24.6531	0.97	2.98	0.82	1.86	IIA	4.5	no	no	poor	yes	37
male	52	41.1399	>1000	no	no	no	no	20.0288	1.9	3.74	0.67	2.16	IB	3.5	no	no	poor	-	-
male	80	43.8227	241	yes	no	yes	yes	23.6	0.97	4.87	1.87	2.65	III	4	no	no	-	-	-
male	76	74.0136	80	yes	yes	no	no	24.3418	1.91	4.01	0.37	1.99	IIB	5	yes	no	moderate	-	-
male	58	195.946	10.9	yes	yes	no	no	24.9337	1.37	3.79	0.9	2.34	IIB	4	yes	no	moderate	-	-
male	57	45.6618	10.2	no	no	no	no	20.3954	0.72	4.42	2.04	2.12	III	3.7	yes	no	-	-	-
male	51	43.2424	＜2	no	no	no	no	21.4844	0.89	3.75	1.08	2.19	IB	2	no	no		yes	34
male	65	45.9383	333	yes	no	no	no	21.2245	1.35	3.79	1.11	2.19	IIA	2.5	no	no	well	no	9
male	68	125.103	801	no	no	no	no	21.0938	0.89	3.99	1.03	2.58	IV	3.6	yes	yes	-	-	-
female	63	52.6956	70.2	no	no	no	no	20.6612	1.29	4.3	1.28	2.16	IV	8.9	yes	yes		-	-
male	64	44.7877	54.9	yes	no	no	no	25.2401	1.04	4.86	1.11	3.18	III	3.8	yes	no	moderate	no	23
female	65	63.2369	186	no	no	no	no	21.2183	3.24	4.58	0.23	1.27	IB	3.6	no	no	-	yes	33
male	64	35.3077	109	yes	no	yes	no	19.1406	1.35	3.41	0.48	1.7	IIA	4	no	no	moderate	yes	43
male	52	38.2715	＜2	yes	yes	no	yes	23.7387	1.32	5.19	1.49	3.13	IIB	3.5	yes	no	moderate	yes	33
female	49	37.57	245	no	no	no	yes	23.533	0.73	3.09	1.52	1.35	III	3.7	no	no	-	no	15
male	32	39.6106	595	yes	yes	no	no	16.8525	1.18	3.74	0.87	2.31	IB	3	no	no	-	no	12
male	63	32.5717	＞1000	no	no	no	no	15.0356	0.66	4.76	1.06	3.32	IV	1.1	yes	yes	-	no	28
male	56	60.3143	636	no	no	yes	no	21.5349	0.63	3.51	1.13	2.22	IV	3.7	yes	yes	-	yes	31
male	61	83.9723	＞1000	yes	yes	no	no	19.6927	2.05	3.83	0.71	2.02	IV	6.4	yes	yes	-	no	29

## Sheet: BDG
Disease	Gender	Age	PCSK9	CA19-9	Smoking	Drinking	Diabetes mellitus	Hypertension	BMI	Triglycerides	Cholesterol	HDL	LDL
pancreatic neuroendocrine tumor	male	56	29.074	27	yes	yes	no	yes	24.2424	0.61	3.11	1.07	1.69
pancreatic neuroendocrine tumor	male	42	17.2298	6.88	no	no	no	no	25.763	3.19	4.87	1.16	3.01
cystadenoma	female	48	59.765	8.63	no	no	no	no	22.8928	0.75	4.97	1.7	3.02
benign tissue hyperplasia	female	41	48.7143	2.34	no	no	no	no	25.1039	1.56	3.58	1.03	1.91
intraductal papillary mucinous neoplasm	male	48	16.7357	11	yes	yes	no	no	21.3068	1.19	4.29	1.19	2.46
solid pseudopapillary tumor	female	16	9.41443	<2	no	no	no	no	18.4265	1.12	2.91	0.79	1.77
intraductal papillary mucinous neoplasm	female	28	18.8864	11.2	no	no	no	no	19.5556	2.03	4.1	1.14	2.46
solid pseudopapillary tumor	female	24	18.3502	11.3	no	no	no	no	21.7161	1.18	4.44	1.35	2.6
cystadenoma	male	64	14.8805	7.92	no	no	no	yes	27.8852	1.62	4.36	1.54	2.35
pancreatic neuroendocrine tumor	female	51	116.603	20.6	no	no	no	no	19.1953	1.44	3.1	1.43	1
intraductal papillary mucinous neoplasm	female	63	17.2593	25.5	no	no	no	yes	20	1.43	5.1	1.47	3.27
solid pseudopapillary tumor	female	39	11.2447	9.39	no	no	no	no	21.6128	1.6	3.98	1.42	2.18
intraductal papillary mucinous neoplasm	female	57	39.9612	20.1	no	no	no	no	19.91	0.79	2.89	1.16	1.39
pancreatic neuroendocrine tumor	female	56	29.4209	78.7	no	no	yes	no	16.4062	0.86	3.94	1.12	2.39
intraductal papillary mucinous neoplasm	male	61	146.827	42	no	no	no	no	24.0238	1.64	5.45	1.06	3.64
intraductal papillary mucinous neoplasm	female	76	41.6147	14.2	no	no	no	yes	21.6311	0.88	4.07	1.09	2.56
cystadenoma	male	54	40.9322	10.8	yes	no	no	no	27.6817	1.59	3.76	0.94	2.42
cystadenoma	female	47	36.929	11.5	no	no	no	yes	19.8642	1.88	4.61	1.47	2.53
cystadenoma	female	52	43.9614	5.24	no	no	no	yes	21.7555	0.96	4.54	1.19	2.95
pancreatic neuroendocrine tumor	male	33	47.4445	9.82	yes	no	no	no	28.0497	1.54	3.94	0.83	2.64
intraductal papillary mucinous neoplasm	male	54	41.5003	7.8	no	no	no	no	21.4533	0.96	3.02	1.29	1.27
pancreatic neuroendocrine tumor	female	42	91.0213	7.27	no	no	no	no	26.1427	2.01	4.15	0.81	2.5
solid pseudopapillary tumor	female	22	40.1482	14.2	no	no	no	no	29.6449	1.1	4.05	1.03	2.63
cystadenoma	female	30	28.3889	26.7	no	no	no	no	15.6225	0.56	3.2	1.6	1.43
intraductal papillary mucinous neoplasm	male	62	46.8047	7.69	yes	yes	no	no	28.8147	1.6	4.61	0.97	2.99
intraductal papillary mucinous neoplasm	female	53	51.1797	18.3	no	no	no	no	17.5781	1.38	4.88	1.76	2.66
cystadenoma	female	36	12.8549	12.8	no	no	no	no	19.9792	0.82	3.65	1.19	1.98
solid pseudopapillary tumor	female	46	18.1026	3.58	no	no	no	no	25.4767	1.79	4.84	1.36	2.61
solid pseudopapillary tumor	male	55	20.2729	6.48	no	no	no	no	20.202	1.12	4.64	0.82	3.2
pancreatic neuroendocrine tumor	female	33	19.7009	26.9	no	no	no	no	21.7555	1.26	4.16	0.92	2.63
pancreatic neuroendocrine tumor	male	50	18.3502	11.1	no	no	no	yes	27.5482	2.52	6.57	2.01	3.77
pancreatic neuroendocrine tumor	male	60	14.7513	44.6	yes	no	yes	yes	21.5349	0.81	3.97	1.14	2.57
Ectopic spleen	male	34	42.2051	-	no	no	no	no	23.3844	1.17	4.11	1.01	2.45
pancreatic neuroendocrine tumor	male	67	38.7453	-	yes	yes	yes	yes	21.883	1.39	3.46	0.84	2.02
fatty infiltration	male	66	53.7196	-	yes	yes	no	yes	28.2828	2.77	3.53	0.87	1.69
pancreatitis	female	54	100.586	5.95	no	no	no	no	22.2222	1.62	3.55	0.48	2.23
pancreatitis	male	48	68.87	-	yes	yes	no	no	20.1956	1.24	5.36	0.76	3.16
pancreatitis	male	35	19.0468	11.2	no	no	no	no	19.9184	1.89	2.74	1.11	1.13
pancreatitis	male	56	19.69	214	no	no	no	no	20.5151	3.35	5.43	0.64	3.35
pancreatitis	female	80	60.6519	7.44	no	no	yes	yes	21.4844	0.86	3.94	2.14	1.43
pancreatitis	female	25	61.3096	28.8	no	no	no	no	28.3987	30.91	18.14	0.58	0.83
pancreatitis	female	56	93.3709	63.9	no	no	no	no	20.3954	1.36	3.85	1.14	1.83
pancreatitis	female	68	53.1502	-	no	no	no	yes	24.8047	4.84	4.53	0.98	1.53
pancreatitis	female	49	75.7674	-	no	no	no	no	23.7387	1.4	4.05	0.54	2.7
pancreatitis	male	30	50.3452	17.6	yes	yes	yes	no	26.3334	14.28	5.04	0.61	1.64
pancreatitis	male	43	41.4033	<2	no	no	no	no	23.2438	4.43	3.32	0.55	1.16
pancreatitis	male	62	59.3299	34.5	no	no	no	yes	20.9573	0.76	3.53	1.1	1.97
pancreatitis	female	62	34.3457	<2	no	no	no	yes	26.0146	1.14	4.45	1.15	2.95
pancreatitis	male	57	41.0946	37.6	no	no	no	yes	18.8189	0.52	2.4	1.25	0.98
pancreatitis	female	47	38.3994	6.44	no	no	yes	no	22.6326	1.17	4.09	1.25	2.39
pancreatitis	male	50	31.4674	7.79	no	no	no	no	25.0341	1.49	4.24	0.81	2.74
pancreatitis	male	49	39.9027	15.7	yes	no	no	no	26.396	6.67	3.29	0.48	0.52
pancreatitis	male	52	50.1602	12.9	yes	yes	no	no	18.7783	1.34	3.74	0.51	2.56
pancreatitis	male	37	46.8899	8.54	yes	no	no	no	24.7759	1.94	4.22	0.78	2.91
pancreatitis	female	69	100.409	＜2	no	no	no	no	22.8269	0.93	4.82	1.61	2.76
pancreatitis	male	54	17.437	4.3	no	no	no	no	21.0938	0.99	3.07	0.76	1.75
pancreatitis	male	52	25.7073	33.1	yes	yes	no	no	16.8061	0.7	4.1	1.63	2.28
pancreatitis	male	58	30.3383	＜2	yes	yes	no	yes	17.8465	1.28	5.3	1.67	3.03
pancreatitis	male	54	23.1008	<2	yes	yes	no	yes	22.0317	4.29	5.11	1	2.35
pancreatitis	male	53	23.2942	<2	no	no	no	no	22.9481	1.02	4.24	1.36	2.31
pancreatitis	male	55	20.2729	-	yes	yes	no	no	22.8529	5.19	3.67	0.66	2.07
pancreatitis	female	55	17.9188	8.63	no	no	no	no	24	2.44	2.96	0.99	1.4
pancreatitis	male	62	34.0278	＜2	no	no	yes	no	20.5499	1	3.38	1.19	1.69
pancreatitis	male	51	53.6238	23.6	yes	no	no	no	22.0386	1.1	3.88	1.44	2.06
pancreatitis	male	17	35.8344	＜2	no	no	no	no	18.5901	1.55	5.31	0.93	3.64
pancreatitis	male	65	26.6979	11.2	yes	yes	yes	no	17.0993	0.69	2.77	0.74	1.63
pancreatitis	male	54	35.0438	26.6	no	no	no	no	21.2585	0.63	3.45	1.84	1.35
pancreatitis	male	59	30.1374	7.7	yes	yes	no	no	21.4844	2.97	3.62	0.74	1.57
pancreatitis	male	53	50.9912	21.9	yes	yes	no	no	17.9982	1.25	3.18	0.94	1.48
pancreatitis	male	34	24.6511	11	yes	no	no	no	16.7573	1.36	3.83	1.14	2.33
pancreatitis	female	52	17.9799	12.8	no	no	no	no	21.0962	1.13	2.43	0.95	1.06
pancreatitis	male	49	39.0968	10.9	yes	yes	yes	yes	20.9042	2.9	5.1	1.24	2.71
pancreatitis	male	57	23.3331	58..4	no	no	no	no	19.7232	0.64	1.74	0.52	1.01
pancreatitis	male	52	6.9004	14.1	no	no	no	no	23.4375	0.9	4.28	1.38	2.62
pancreatitis	male	52	41.2723	11.4	no	no	no	yes	22.6474	1.35	3.58	1.06	1.92
pancreatitis	male	28	66.6655	9.53	yes	yes	no	no	21.7051	1.9	3.35	0.86	1.89
pancreatitis	male	44	48.6164	8.03	yes	yes	yes	no	25.5036	0.62	3.16	1.06	1.78
pancreatitis	female	30	72.1296	5.47	no	no	no	yes	15.4006	15.6	6.67	0.65	1.38
pancreatitis	male	36	93.6365	＜2	yes	no	no	no	17.301	5.67	5.13	0.3	2.26
pancreatitis	female	42	35.3004	<2	no	no	no	no	26.1427	0.56	2.87	0.76	1.7
pancreatitis	female	34	33.4409	63.7	no	no	no	no	22.1222	0.49	3.79	1.16	2.46
pancreatitis	female	54	40.4826	29.3	no	no	yes	yes	23.2335	6.4	5.93	0.95	1.48
pancreatitis	male	44	42.3069	12.6	yes	yes	no	no	19.487	1.05	4.36	0.89	2.98
pancreatitis	female	31	43.6638	9.24	no	no	yes	no	22.8329	0.72	2.98	1.3	1.32
pancreatitis	male	34	53.3333	-	yes	no	no	no	22.4913	1.24	3.65	0.97	2.06
pancreatitis	male	49	14.5212	5.77	no	no	yes	yes	25.3515	1.47	2.77	1.25	0.9
pancreatitis	male	64	15.3801	13.8	no	no	no	no	20.7612	1.67	3.83	1.03	2.14
pancreatitis	male	52	16.9087	-	yes	yes	no	no	21.3741	0.92	4.13	1.09	2.49
pancreatitis	male	54	7.67686	10.8	no	no	no	no	18.5568	1.65	7.01	1.28	4.94
pancreatitis	male	45	5.89079	27.1	no	no	no	no	19.8791	0.72	3.47	0.78	2.5
pancreatitis	male	66	20.2729	4.25	no	no	yes	yes	18.424	1	3.1	1.06	1.7
pancreatitis	male	36	14.7771	6.3	yes	yes	no	no	24.2215	1.41	2.92	0.34	1.77
pancreatitis	male	46	62.7773	60.6	no	no	no	no	25.6055	1.76	5.14	0.62	3.35
pancreatitis	male	32	38.8406	27.1	no	no	no	no	15.917	0.56	4.04	1.21	2.67
pancreatitis	male	71	59.3731	8.78	yes	yes	no	no	19.052	1.25	4.59	1.1	2.99
pancreatitis	female	44	43.8227	19.8	no	yes	no	no	20.1264	0.93	4.12	1.25	2.45
pancreatitis	male	54	36.7423	6.53	no	no	yes	yes	20.5693	1.31	3.14	0.56	1.95

## Sheet: HC
PCSK9	CA19-9	Triglycerides	Cholesterol	HDL	LDL
55.3557	-	0.74	4.88	1.72	2.79
103.866	5.75	0.52	5.17	1.44	3.56
221.29	5.72	0.84	5.74	2.03	3.46
132.713	16.3	1.49	4.32	1.52	2.35
190.61	9.32	0.57	4.24	1.82	2
110.203	18.9	1.91	6.56	1.67	3.95
101.143	8.32	1.36	4.43	1.48	2.58
71.1995	12	1.46	5.51	1.1	3.85
138.329	8.71	1.72	5.27	0.98	3.63
168.186	6,92	6.55	0.89	1.93	6.92
148.826	8.35	5.16	0.8	3.29	8.35
172.194	-	-	-	-	-
126.695	4.89	1.25	6.14	1.223	4.35
117.722	18.3	0.7	5.45	1.87	3.2
133.494	8.42	1.35	5.1	1.36	3.2
96.4654	9.44	1.16	4.41	1.19	2.84
82.0274	10.8	0.48	4.72	1.31	3.13
127.06	11.3	1	4.8	1.68	2.74
96.7181	23.8	1.09	5.17	1.58	3.06
94.2276	＜2	1.48	5.69	1.19	3.96
105.83	＜2	0.83	4.75	1.64	2.78
89.4762	10.2	1	4.83	1.31	3.2
94.7194	-	-	-	-	-
67.3562	7.53	1.52	4.4	1.18	2.72
127.06	15.1	1.52	3.97	1.41	1.99
64.3603	＜2	1.2	4.99	1.41	3.21
109.014	＜2	1.91	4.1	1.08	2.21
101.143	4.45	1.58	5.57	1.4	3.68
156.524	25.22	1.34	3.57	1.02	2.18
50.7871	-	-	-	-	-
75.2621	7.68	0.77	5.69	1.98	3.27
119.376	16.5	1.3	5.27	1.53	3.23
57.8326	8.43	1.35	4.8	1.6	2.74
79.3661	9.72	0.55	4.33	1.75	2.3
73.9443	13.99	1.39	5.5	1.18	3.95
98.2515	6.65	0.78	3.61	1.5	1.82
67.3071	13.7	1.79	6.6	1.32	4.87
56.5131	＜2	0.65	4.58	1.97	2.49
74.0314	7.05	1.25	5.54	1.38	3.84
51.1679	-	1.12	4.4	1.39	2.58
45.4507	5.64	1.42	3.53	1.38	1.82
28.8642	5.39	1.4	3.56	1.18	2
59.6906	35.7	1.25	4.72	1.28	2.96
57.012	-	1.49	3.85	1.38	2.04
203.288	＜2	1.15	3.89	1.42	2.08
52.6073	21.1	1.94	5.58	1.65	3.37
63.7621	＜2	0.52	3.98	2.07	1.78
31.7303	-	1.64	4.51	1.09	2.97
47.6793	15.3	0.92	4.58	1.72	2.64
57.821	-	0.44	4.28	1.52	2.73
61.194	4.56	1.03	4.81	1.89	2.78
58.0253	25.4	0.95	4.81	1.72	2.8
31.3633	17.1	0.48	4.15	1.66	2.37
42.9715	5	1.89	5.73	1.15	4.02
36.0145	9.7	0.81	5.56	2.03	3.14
40.2991	10.5	2.22	4.42	0.83	2.85
55.5304	20.2	2.48	4.12	1.3	2
57.923	15	1.97	4.93	1.2	3.27
74.9977	4.56	0.84	4.28	1.16	2.93
48.1726	32.2	0.37	3.44	1.82	1.38
36.4385	9.71	0.78	5.32	1.88	3.08
44.5313	25.5	0.78	4.55	1.43	2.81
33.6332	7.48	1.8	4.49	1.17	2.74
31.1555	-	-	-	-	-
43.1906	4.36	0.98	5.56	1.6	3.6
86.0639	-	1.33	5.76	1.81	3.49
105.207	6.5	1.47	4.99	1.4	3.13
36.1956	-	-	-	-	-
37.365	-	-	-	-	-
21.4272	-	-	-	-	-
29.6411	-	-	-	-	-
22.0456	-	-	-	-	-
25.4	6.78	1.1	4.71	1.67	2.54
44.2295	-	1.03	4.74	1.15	3.09

## Sheet: IHC
	cancer				normal
	weak staining	moderate staining	strong staining	IHC score	weak staining	moderate staining	strong staining	IHC score
1	20	30	50	230	30	35	30	190
2	10	10	70	240	10	20	20	110
3	10	30	70	280	20	10	20	100
4	20	50	30	210	20	0	10	50
5	20	40	10	130	30	10	10	80
6	30	20	0	70	30	10	0	50
7	30	10	0	50	20	10	10	70
8	10	20	70	260	10	30	30	160
9	30	40	10	140	30	20	20	130
10	10	20	30	140	20	30	20	140
11	20	40	30	190	20	10	10	70
12	10	30	50	220	30	10	10	80
13	20	40	30	190	20	20	20	120
14	20	30	40	200	20	10	20	100
15	20	20	60	240	10	30	30	160
16	50	10	20	130	10	20	10	80
17	10	30	50	220	30	20	10	100
18	20	20	40	180	40	20	10	110
19	30	30	20	150	20	20	0	60
20	10	20	0	50	10	20	0	50
21	30	10	10	80	10	30	0	70
22	40	20	20	140	20	10	0	40
23	30	10	0	50	30	10	0	50
24	30	30	30	180	20	10	0	40
25	20	10	0	40	20	10	0	40
26	30	30	30	180	20	10	0	40
27	30	10	0	50	30	20	10	100
28	20	20	10	90	30	10	0	50
29	30	30	0	90	30	20	0	70
30	30	10	40	170	30	20	20	130
31	20	10	50	190	30	20	20	130
32	20	20	20	120	40	20	10	110
33	20	10	0	40	20	10	0	40
34	20	30	20	140	20	10	0	40
35	10	20	40	170	20	10	0	40
36	10	20	70	260	20	20	10	90
37	30	30	10	120	10	10	10	60
38	20	20	10	90	30	20	10	100
39	10	40	40	210	20	30	30	170
40	10	30	60	250	40	20	10	110
41	10	20	60	230	30	30	30	180
42	20	30	30	170	20	20	30	150
43	10	40	50	240	30	10	0	50
44	10	10	20	90	20	10	10	70
45	10	20	40	170	30	20	20	130
46	30	10	10	80	30	10	0	50
47	20	40	30	190	30	10	0	50
48	20	30	10	110	20	10	10	70
