# Supplementary material for: Serum PCSK9 is a novel serological biomarker for the diagnosis and prognosis of pancreatic cancer
Source: PeerJ. 2024 Sep 10;12:e18018. doi: 10.7717/peerj.18018 (PMC11397121; doi:10.7717/peerj.18018)
Supplement: Supplemental Information 3 [file peerj-12-18018-s003.xls]

## Sheet: Table3
Biomarkers	AUC	95%CI	Cut-off value	Sensitivity(%)	Specificity(%)	P
PC VS HC
CA19-9	0.916	0.865-0.967	39.6U/mL	75.6	100	<0.05
PCSK9	0.609	0.528-0.691	54.8ng/mL	54.2	67.6	<0.05
PCSK9+CA19-9	0.935	0.892-0.978	-	84.6	92.2	<0.05
CA19-9 VS PCSK9+CA19-9						0.21
PC VS BDG
CA19-9	0.879	0.822-0.937	46.5U/mL	74.4	93.6	<0.05
PCSK9	0.719	0.652-0.787	42.3ng/mL	65.3	65.7	<0.05
PCSK9+CA19-9	0.899	0.847-0.951	-	79.5	91	<0.05
CA19-9 VS PCSK9+CA19-9						0.21
Notes. Abbreviations: AUC, areas under the curve.
